# Supplementary material for: Unmet medical needs in paroxysmal nocturnal hemoglobinuria treatment: Insights from the SATURNO Study on C5 inhibitor therapy in Spain
Source: Research Square preprint supplement (doi:10.21203/rs.3.rs-7018191/v1), 2025-08-22
Supplement: Supplementary file 1 [file 8d9596acd17c012f645a6478.docx]

**APPENDIX: SATURNO STUDY GROUP MEMBERS**

Fernando Ataúlfo González, Hematology Department, Hospital Clínico San Carlos, Madrid, Spain.

Monica Ballesteros, Hematology Department, Hospital General Universitario Gregorio Marañón, Madrid, Spain.

Silvia De la Iglesia, Hematology Department, Hospital Universitario de Gran Canaria Doctor Negrín, Las Palmas de Gran Canaria, Spain.

Rafael Andres Del Orbe, Hematology Department, Hospital Universitario de Cruces, Barakaldo, Spain.

Luis Fernando Fernández Fuertes Hematology Department, Complejo Hospitalario Insular-Materno Infantil de Gran Canaria, Las Palmas de Gran Canaria, Spain.

Anna Gaya, Hematology Department, Hospital Clínic de Barcelona, Barcelona, Spain.

Ana Pilar González, Hematology Department, Hospital Universitario Central de Asturias, Oviedo, Spain.

Isidro Jarque, Hematology Department, Hospital Universitari I Politècnic La Fe, Valencia, Spain.

Esperanza Lavilla, Hematology Department, Hospital Universitario Lucus Augusti, Lugo, Spain.

Ramiro Núñez, Hematology Department, Hospital Universitario Virgen del Rocío, Sevilla, Spain.

Eduardo Jose Salido, Hematology Department, Hospital Universitario Virgen de la Arrixaca, Murcia, Spain.

Maria M, Hematology Department, Hospital Universitario Virgen de Valme, Sevilla, Spain.

Carlos Vallejo, Hematology Department, Complejo Hospitalario Universitario de Santiago, Complejo Asistencial Universitario de Salamanca, Spain.
